# Supplementary material
Source: ML conference proceedings conference paper supplement (https://openreview.net/forum?id=sQ2LdeHNMej)
Supplement: supplementary_material [file attachment]

---

# Federated Hypergradient Descent

---

Anonymous Author(s)

Affiliation

Address

email

## Abstract

In this work, we explore combining automatic hyperparameter tuning and optimization for federated learning (FL) in an online, one-shot procedure. We apply a principled approach on a method for adaptive client learning rate, number of local steps, and batch size. In our federated learning applications, our primary motivations are minimizing communication budget as well as local computational resources in the training pipeline. Conventionally, hyperparameter tuning methods involve at least some degree of trial-and-error, which is known to be sample inefficient. In order to address our motivations, we propose FATHOM (Federated AuTomatic Hyperparameter OptiMization) as a one-shot online procedure. We investigate the challenges and solutions of deriving analytical gradients with respect to the hyperparameters of interest. Our approach is inspired by the fact that we have full knowledge of all components involved in our training process, and this fact can be exploited in our algorithm impactfully. We show that FATHOM is more communication efficient than Federated Averaging (FedAvg) with optimized, static valued hyperparameters, and is also more computationally efficient overall. As a communication efficient, one-shot online procedure, FATHOM solves the bottleneck of costly communication and limited local computation, by eliminating a potentially wasteful tuning process, and by optimizing the hyperparameters adaptively throughout the training procedure without trial-and-error. We show our numerical results through extensive empirical experiments with the Federated EMNIST-62 (FEMNIST) and Federated Stack Overflow (FSO) datasets, using FedJAX as our baseline framework.

## 1 Introduction

Federated learning (FL) for on-device applications has its obvious social implications, due to its inherent privacy-protection feature. It opens up a broad range of opportunities to allow a massive number of devices to collaborate in developing a shared model by retaining private data on the devices. The ubiquity of machine learning (ML) on consumer data, coupled with the growth of privacy concerns, has pushed researchers and developers to look for new ways to protect and benefit end-users. In order for FL to deliver its promise in deployed applications, there are still many open challenges remained to be solved. We are especially interested in the overall communication efficiency of the FL pipeline for it to be realistically deployed in a unique communication environment over expensive links. To begin, consider a typical step in a machine learning (ML) pipeline: hyperparameter tuning. Whether it is in a centralized, distributed or federated setting, it is an essential step to achieve an optimal operation for the training process. At the heart of an ML training process is the optimization algorithm. In particular, we are interested in using Federated Averaging (FedAvg) as our baseline

36 federated optimization algorithm for our work. This is because, despite all the recent innovations in  
37 FL since its introduction in 2016 by McMahan et al. [2016], FedAvg remains the de facto standard in  
38 federated optimization for both research and practice, due to its simplicity and empirical effectiveness.  
39 In order for FedAvg to operate effectively, it requires properly tuned hyperparameter values.

40 Our work focuses specifically on hyperparameter optimization (HPO) of: 1) client learning rate,  
41 2) number of local steps, as well as 3) batch size, for FedAvg. We propose FATHOM (Federated  
42 AuTomatic Hyperparameter OptiMization), which is an online algorithm that operates as a one-shot  
43 procedure. In the rest of this paper, we will go through a few notable recent state-of-the-art works on  
44 this topic, and make justifications for our new approach. Then we will derive a few key steps for our  
45 algorithm, followed by a theoretical convergence bound for adaptive learning rate and number of local  
46 steps in the non-convex regime. Lastly, we present numerical results on our empirical experiments  
47 with neural networks on the FEMNIST and FSO datasets.

48 Our contributions are as follows:

- 49 • We derive gradients with respect to client learning rate and number of local steps for FedAvg,  
50 for an online optimization procedure. We propose FATHOM, a practical one-shot procedure  
51 for joint-optimization of hyperparameters and model parameters, for FedAvg.
- 52 • We derive a new convergence upper-bound with a relaxed condition (see Section 4 and  
53 remark 2), to highlight the benefits from the extra degree-of-freedom that FATHOM delivers  
54 for performance gains.
- 55 • We present empirical results that show state-of-the-art performance. To our knowledge,  
56 we are the first to show gain from an online HPO procedure over a well-tuned equivalent  
57 procedure with fixed hyperparameter values.

## 58 2 Related Work and Justifications for FATHOM

59 We explore the question whether the FATHOM approach is justified over the more recent, state-of-  
60 the-art methods that are designed for the same goal: a single-shot online hyperparameter optimization  
61 procedure for FL. Zhou et al. [2022] proposed Federated Loss Surface Aggregation (FLoRA), a  
62 general single-shot HPO for FL, which works by treating HPO as a black-box problem and by  
63 performing loss surface aggregation for training the global model. Khodak et al. [2021] draws  
64 inspiration from weight-sharing in Neural Architectural Search (Pham et al. [2018], Cai et al. [2019]),  
65 and proposed FedEx, which is an online hyperparameter tuning algorithm that uses exponentiated  
66 gradients to update hyperparameters. On the other hand, Mostafa [2019]’s RMAH and Guo et al.  
67 [2022]’s Auto-FedRL both use REINFORCE (Williams [1992]) in their agents to update hyperparam-  
68 eters in an online manner, by using relative loss as their trial rewards. One basic assumption among  
69 these methods, is that at least some of the gradients with respect to the hyperparameters are unavail-  
70 able directly. Generalized techniques are used to update these quantities, involving Monte-Carlo  
71 sampling and evaluation with held-out data. One key benefit with techniques such as these is their  
72 generalizability for a wide range of different hyperparameters. On the other hand, we identify a few  
73 areas with these methods that we would like to improve on. One, information about the internals of  
74 the procedure can and should be exploited. Two, communication overhead becomes a concern, since  
75 sufficient Monte-Carlo sampling is required for some of these techniques to converge, an example  
76 being the re-parametrization trick (Kingma and Welling [2013]) which is used for FedEx, RMAH and  
77 Auto-FedRL. From initial observations of their empirical results, while these methods are successful  
78 in hyperparameter tuning and reaching target model accuracy as shown in these works, these goals are  
79 achieved in unspecified numbers of total communication rounds from works based on RL approaches  
80 such as Mostafa [2019] and Guo et al. [2022].

81 The above observations justify exploring our problem differently from previous approaches. Our  
82 method exploits full knowledge of the training process, and it does not require sufficient trials  
83 at potential expense of communication budget. Inspired by the hypergradient descent techniques  
84 developed by Baydin et al. [2017] and Amid et al. [2022] for centralized optimization learning rate,  
85 we develop FATHOM by directing deriving analytical gradients with respect to the hyperparameters  
86 of interest. The result is a sample efficient method which offers both improvements in communication  
87 efficiency and reduced local computation in a single-shot online optimization procedure. Meanwhile,  
88 FATHOM is not as flexibly applicable in optimizing a wide range of hyperparameters, since each

89 gradient needs to be derived separately to take advantage of our full knowledge of the training process.  
 90 We believe this approach is a performance advantage, at the expense of its flexibility.

91 There are other notable relevant works. Charles and Konečný [2020] and Li et al. [2019] proved that  
 92 reducing the client learning rate during training is necessary to reach the true objective. Yet, a line of  
 93 interesting works, such as Dai et al. [2020] and Holly et al. [2021]) applies Bayesian Optimization  
 94 (BO) on federated hyperparamter tuning, by treating it as a closed-box optimization problem. Dai  
 95 et al. [2021] further updates their use of BO in FL by incorporating differential privacy. However,  
 96 these BO-based works do not consider adaptive hyperparameters. Yet, another work (Wang and Joshi  
 97 [2018]) shares similarity to our approach of optimally adapting the number of local steps, with their  
 98 adaptive communication strategy, AdaComm, in the distributed setting. However, their main interest  
 99 is reducing wall-clock time. Lastly, around the same time of this writing, Wang et al. [2022] publishes  
 100 their benchmark suite for FL HPO, called FedHPO-B, which would be valuable to our future work.

### 101 3 Methodology

102 In this section we formalize the problem of hyperparameter optimization (HPO) for FL. We first  
 103 review FedAvg, a de facto standard of federated optimization methods for research baseline and  
 104 practice. Then, we present our method for online-tuning of its hyperparameters, specifically client  
 105 learning rate, number of local steps, and batch size. We call our method FATHOM (Federated  
 106 AuTomatic Hyperparameter OptiMization).

#### 107 3.1 Problem Definition

108 In this paper, we consider the empirical risk minimization (ERM) across all the client data, as an  
 109 unconstrained optimization problem:

$$f^* := \min_{x \in \mathbb{R}^d} \left[ f(x) := \frac{1}{m} \sum_{i=1}^m f_i(x) \right] \quad (1)$$

110 where  $f_i : \mathbb{R}^d \rightarrow \mathbb{R}$  is the loss function for data stored in local client index  $i$  with  $d$  being the  
 111 dimension of the parameters  $x$ ,  $m$  is number of clients, and  $f^* = f(x_*)$  where  $x_*$  is a stationary  
 112 solution to the ERM problem in eq(1).

113 To facilitate some of the discussions that follow, it helps to define assumptions here as we do  
 114 throughout the rest of this paper:

115 **Assumption 1.** (*Unbiased Local Gradient Estimator*) Let  $g_i(x)$  be the unbiased, local gradient  
 116 estimator of  $\nabla f_i(x)$ , i.e.,  $\mathbb{E}[g_i(x)] = \nabla f_i(x)$ ,  $\forall x$ , and  $i \in [m]$ .

#### 117 3.2 Federated Optimization and Tuning of Hyperparameters

118 **Federated Averaging (FedAvg)** We describe the operations of FedAvg from McMahan et al.  
 119 [2016], as follows. At any round  $t$ , each of the  $m$  clients takes a total of  $K_i$  local SGD steps, where  
 120  $K_i = \lfloor E\nu_i/B \rfloor$ , and where  $\nu_i$  is the number of data samples from client index  $i$ ,  $B$  is batch size,  
 121 with epoch number  $E = 1$  being a common baseline. In this version of FedAvg, heterogeneous data  
 122 size is accommodated across clients, and the number of local steps can be manipulated via  $E$  and  
 123  $B$  as hyperparameters. Each local SGD step updates the local model parameters of each client  $i$  as  
 124 follows:  $x_{t,k+1}^i = x_{t,k}^i - \eta_L g_i(x_{t,k}^i)$ , where  $\eta_L$  is the local learning rate and  $k \in [K]$  is the local step  
 125 index. To conclude each round, these clients return the local parameters  $x_{t,K_i}^i$  to the server where  
 126 it updates its global model, with  $x_{t+1} = \sum_i \nu_i x_{t,K_i}^i / \nu$  where  $\nu = \sum_i \nu_i$ . To facilitate some of the  
 127 discussions that follow, we define the following quantities:

$$\bar{\Delta}_t \triangleq x_{t+1} - x_t = \sum_{i=1}^m \frac{\nu_i}{\nu} \Delta_t^i \quad \text{where} \quad \Delta_t^i \triangleq - \sum_{k=0}^{K_i-1} \eta_{L,t} g_i(x_{t,k}^i) \quad (2)$$

128 **Offline Hyperparameter Tuning** Offline tuning is best to be summarized as follows. We first  
 129 define  $U = \{u \in \mathbb{R} \mid u \geq 0\}$  with  $\eta_L \in U$ , and  $V = \{v \in \mathbb{I} \mid v \geq 1\}$  with  $K \in V$ . We also define  
 130  $C = U \times V$ , and  $c = (\eta_L, K)$ , where  $c \in C$ . Offline tuning would have the following objective:

131  $\min_{c \in C} f_{\text{valid}}(x, c)$  s.t.  $x = \operatorname{argmin}_{z \in \mathbb{R}^d} f_{\text{train}}(z, c)$ . With abuse of notation, we use  $f_{\text{valid}}$  for the  
 132 objective function calculated from a validation dataset which is usually held-out before the procedure,  
 133 and  $f_{\text{train}}$  for the objective from training data which usually is just local client data. A few notable  
 134 offline tuning methods are as follows. Global grid-search from Holly et al. [2021] is an example  
 135 of offline tuning that iterates over the entire search grid defined as  $C$ , completing an optimization  
 136 process for each grid point and evaluating the result with a held-out validation set. Global Bayesian  
 137 Optimization from Holly et al. [2021] is another similar example of offline tuning that follows the  
 138 same template and objective. Instead of brute-force grid-search,  $c$  is sampled from a distribution  $\mathcal{D}_C$   
 139 over  $C$ , i.e.  $c \sim \mathcal{D}_C$ , that updates after every iteration.

140 **Online Hyperparameter Optimization** We are interested in an online procedure that combines  
 141 hyperparameter optimization and model parameter optimization, with the following objective:

$$\min_{\substack{x \in \mathbb{R}^d \\ c \in C}} f_{\text{train}}(x, c) \quad (3)$$

142 This formulation is the objective of our method, FATHOM, which we will discuss shortly in detail. It  
 143 has the advantage of joint optimization in a one-shot procedure. Furthermore, it does not assume the  
 144 availability of a validation dataset.

### 145 3.3 Our Method: FATHOM

146 In this section we will introduce our method, FATHOM (Federated AuTomatic Hyperparameter  
 147 OptiMization). Recall from our joint objective, eq(3), that both the model parameters,  $x$ , and  
 148 hyperparameters of the optimization algorithm,  $c$ , are optimized jointly to minimize our objective  
 149 function. An alternative view is to treat  $c$  as part of the parameters being optimized in a classic  
 150 formulation, i.e.  $\min_y f(y)$  with  $y = (x, c)$ . As previously mentioned, our method is inspired by  
 151 hypergradient descent from Baydin et al. [2017] and by exponentiated gradient from Amid et al.  
 152 [2022], both proposed for centralized learning rate optimization. We will present how FATHOM  
 153 exploits our knowledge of analytical gradients to update client learning rate, number of local steps, as  
 154 well as batch size, for an online, one-shot optimization procedure.

155 **Assumption 2.** (Convexity w.r.t.  $\eta_L$  and  $K$ ) We assume  $\mathbb{E}_t(f(x_t))$  is convex w.r.t.  $\eta_L$  and  $K$ , even  
 156 though we assume non-convexity w.r.t.  $x_t$ ). Specifically, convexity w.r.t.  $K$  follows the definition in  
 157 Murota [1998], to accommodate the integer space where  $K$  is defined.

158 **Remark 1.** Assumption 2 is necessary to guarantee the existence of subgradients derived in Theorems  
 159 1 and 2, and it will be assumed for this work. In problems dealing with deep neural networks, it is  
 160 reasonable to not assume convexity w.r.t. hyperparameters. However, from our empirical results, we  
 161 claim that the proposed algorithm is still able to operate as desired under this condition.

#### 162 3.3.1 Hypergradient for Client Learning Rate

163 In this section, we derive the hypergradient for client learning rate in a similar fashion as Baydin et al.  
 164 [2017], with the difference being that they are mainly concerned with the centralized optimization  
 165 problem, and that we are concerned with the distributed setting where clients take local steps. We  
 166 derive the following hypergradient of the objective function as defined in eq(1), taken with respect to  
 167 the learning rate  $\eta_{L,t-1}$  such that it can be updated to obtain  $\eta_{L,t}$ :

$$H_t = \frac{\partial f(x_t)}{\partial \eta_{L,t-1}} = \frac{\partial f(x_t)}{\partial x_t} \cdot \frac{\partial(x_{t-1} + \bar{\Delta}_{t-1})}{\partial \eta_{L,t-1}} = \nabla f(x_t) \cdot \frac{\partial \bar{\Delta}_{t-1}}{\partial \eta_{L,t-1}} \quad (4)$$

168 where  $\bar{\Delta}_t$  is the update step for the global parameters  $x_t$  as defined in eq(2), leading to  $\frac{\partial \bar{\Delta}_t}{\partial \eta_{L,t}} = \frac{\bar{\Delta}_t}{\eta_{L,t}} =$   
 169  $-\sum_{i=1}^m \frac{\nu_i}{\nu} \sum_{k=0}^{K-1} g_i(x_t^{i,k})$ . We also make the approximation  $x_{t+1} - x_t = \bar{\Delta}_t \approx -\eta_{L,t} \nabla f(x_t)$ . We  
 170 can then write the normalized update,  $\bar{H}_t$ , similar to Amid et al. [2022], as follows:

$$\bar{H}_t = \frac{\nabla f(x_t)}{\|\nabla f(x_t)\|} \cdot \left( \frac{\partial \bar{\Delta}_{t-1}}{\partial \eta_{L,t-1}} / \left\| \frac{\partial \bar{\Delta}_{t-1}}{\partial \eta_{L,t-1}} \right\| \right) \approx -\frac{\bar{\Delta}_t}{\|\bar{\Delta}_t\|} \cdot \frac{\bar{\Delta}_{t-1}}{\|\bar{\Delta}_{t-1}\|} \quad (5)$$

171 The resulting hypergradient is a scalar, as expected, and can be used efficiently as part of the update  
 172 rule for  $\eta_L$ , which we will see in Section 3.3.4. The implementation is communication efficient, since  
 173 in each round, each client needs one extra scalar to send back to the server, and likewise the server  
 174 needs to broadcast one extra scalar back to the clients. It is also computationally efficient since it  
 175 avoids calculating the full local gradient  $\nabla f(x_t)$ .

### 3.3.2 Hypergradient for Number of Local Steps

Since the number of local steps is an integer, i.e.  $K = \{k \in \mathbb{I} \mid k \geq 1\}$ , this means  $f(x_t)$  does not exist for non-integer values of  $K$ . We formulate a subgradient as a surrogate of the hypergradient  $\partial f(x_t)/\partial K$ , as follows. We will call this a hyper-subgradient.

**Theorem 1.** *When a piecewise function  $L_t$  is defined for every value of  $K_0 \in [K]$  on  $l$ , such that  $0.0 \leq l < 1.0$ , we claim, under Assumption 2, that the following is a subgradient of  $f(x_t)$  at  $K_t = K_0$ :*

$$\frac{\partial L_t}{\partial l} = \nabla f(x_t) \cdot \left( -\eta_{L,t} \sum_{i=1}^m g_i(x_{t-1}^{i,K_t-1}) \frac{\nu_i}{\nu} \right) \quad (6)$$

where  $l$  represents the marginal fraction of local steps beyond  $K_0$ . We leave the proof (with an illustration in Figure 2) in the Appendix section beginning in eq(20).

The result from Theorem 1 is not sufficiently communication-efficient for implementing an update rule for  $K$ . This is because it would require the quantity  $g_i(x_{t-1}^{i,K_t-1})$  to be communicated from each client  $i$  to the server. To save communication, let us reuse what the server has in memory:  $\bar{\Delta}_t = \left( -\eta_L \sum_{i=1}^m \frac{\nu_i}{\nu} \sum_{k=0}^{K_t-1} g_i(x_t^{i,k}) \right)$ . If we let:

$$S_t = \nabla f(x_t) \cdot \left( -\eta_{L,t} \sum_{i=1}^m \frac{\nu_i}{\nu} \sum_{k=0}^{K_t-1} g_i(x_{t-1}^{i,k}) \right) l \quad (7)$$

$$N_t = \frac{\partial S_t}{\partial l} = \nabla f(x_t) \cdot \left( -\eta_{L,t} \sum_{i=1}^m \frac{\nu_i}{\nu} \sum_{k=0}^{K_t-1} g_i(x_{t-1}^{i,k}) \right) = \nabla f(x_t) \cdot \bar{\Delta}_{t-1} \quad (8)$$

$$\bar{N}_t = \frac{\nabla f(x_t)}{\|\nabla f(x_t)\|} \cdot \frac{\bar{\Delta}_{t-1}}{\|\bar{\Delta}_{t-1}\|} \approx -\frac{\bar{\Delta}_t}{\|\bar{\Delta}_t\|} \cdot \frac{\bar{\Delta}_{t-1}}{\|\bar{\Delta}_{t-1}\|} \quad (9)$$

where eq(9) is the normalized update as in Amid et al. [2022]. We claim that eq(8) is a positively-biased version of eq(6), which has its practical importance due to the fact that the last term in eq(6) from Theorem 1 results in zero-mean, noisy gradients, when the local functions are nearing their local solutions, when in fact, this is the area where more local work is not needed. Thus, a positive bias is desirable to drive the number of local steps down. This result is also useful from a communication efficiency perspective in its implementation, because the server has all the components to calculate this quantity, and would not require additional communication.

### 3.3.3 Regularization for Number of Local Steps

One of the goals for FATHOM is savings in local computation. To avoid excessive number of local steps, we further develop a regularization term for local computation against excessive  $K$ , which is a proxy for the hypergradient of the local client functions at the end of each round:  $\partial f_i(x_t^{i,K})/\partial K$ .

**Theorem 2.** *When a piecewise function  $J_t$  is defined for every value of  $K_0 \in [K]$  on  $l$ , such that  $0.0 \leq l < 1.0$ , we claim, under Assumption 2, that the following is a subgradient of  $\sum_{i=1}^m f_i(x_t^{i,K_t})$  at  $K_t = K_0$ :*

$$\frac{\partial J_t}{\partial l} = -\eta_{L,t} \sum_{i=1}^m \frac{\nu_i}{\nu} \mathbb{E}[g_i(x_t^{i,K_0-1})] \cdot g_i(x_t^{i,K_t}) \approx -\eta_{L,t} \sum_{i=1}^m \frac{\nu_i}{\nu} \sum_{k=0}^{K_t-1} g_i(x_t^{i,k}) \cdot g_i(x_t^{i,K_t}) \quad (10)$$

where  $l$  represents the marginal fraction of local steps beyond  $K_0$ . We leave the proof in the Appendix section beginning in eq(24).

In our algorithm, we use the normalized update based on the following biased proxy, since eq(10) tends to be noisy from  $g_i(x_t^{i,K_t})$ .

$$G_t = -\eta_{L,t} \sum_{i=1}^m \frac{\nu_i}{\nu} \min_{K \leq K_t} \left( \sum_{k=0}^{K-1} g_i(x_t^{i,k}) \cdot g_i(x_t^{i,K}) \right) \quad (11)$$

$$\bar{G}_t = -\eta_{L,t} \sum_{i=1}^m \frac{\nu_i}{\nu} \min_{K \leq K_t} \left( \frac{\sum_{k=0}^{K-1} g_i(x_t^{i,k})}{\left\| \sum_{k=0}^{K-1} g_i(x_t^{i,k}) \right\|} \cdot \frac{g_i(x_t^{i,K})}{\|g_i(x_t^{i,K})\|} \right) \quad (12)$$

where  $\bar{G}_t$  is the normalized update. The proxy yields a bias towards smaller number of local steps, which is desirable for reducing local computation. We use this biased proxy against using a more typical regularization such as L2 for the number of local steps, based on initial empirical results for better performance.

### 3.3.4 Normalized Exponentiated Gradient Updates

For the update rules of the hyperparameters  $\eta_L$  (client learning rate) and  $K$  (number of client local steps), we use the normalized exponentiated gradient descent method (EGN) with no momentum, rather than a conventional linear update method such as the additive update of hypergradient descent proposed in Baydin et al. [2017]. It is reasonable to use exponentiated gradient (EG) methods for updates of hyperparameters that are strictly positive in value. EG methods also enjoy significantly faster convergence properties when only a small subset of the dimensions are relevant, according to Amid et al. [2022].

EG methods have been proposed in previous works for a variety of applications (Khodak et al. [2021], Amid et al. [2022], Li et al. [2020]), and analyzed in depth (Ghai et al. [2019]), where its convergence has been studied and validated (Li and Cevher [2018]). Recently, Amid et al. [2022] showed that EGN is the same as the multiplicative update for hypergradient descent proposed in Baydin et al. [2017], when the approximation  $\exp(\cdot) \approx 1 + \cdot$  is made. From our observations, we believe that momentum is not needed for the effectiveness of EGN in our application, as validated in our numerical results. We also opted-out of adding further complexity such as extra weights and activation functions to model the relationships between  $\eta_{L,t}$  and  $K_t$ , because it would require more samples to optimize and because FATHOM is a one-shot procedure. Furthermore, due to the non-stationary nature of these values, we opt for a simpler scheme for faster performance.

Hence, for the update rule of client learning rate,  $\eta_L$ , we have:

$$\eta_{L,t+1} = \eta_{L,t} \exp(-\gamma_\eta \bar{H}_t) \quad (13)$$

where  $\bar{H}_t$  is as defined in eq(5). For number of local steps, we observe that it is related to batch size in round  $t$ ,  $B_t$ , as follows. To accommodate heterogeneity of local dataset sizes among clients, we have number of local data samples from client  $i$  to be  $\nu_i$ . The number of local steps for client  $i$  is  $K_i = \lfloor \nu_i E_t / B_t \rfloor$ , where  $E_t$  is number of epochs, with  $E_t = 1$  meaning the entire local dataset for each client to be processed once per round. We derive update rules for  $E_t$  and  $B_t$  globally to optimize the number of local steps, without having to make any changes to our theoretical analysis to accommodate the heterogeneity of local dataset sizes:

$$E_{t+1} = E_t \exp(-\gamma_E (\bar{N}_t + \bar{G}_t)) \quad (14)$$

and

$$B_{t+1} = B_t \exp(-\gamma_B (-\bar{G}_t)) \quad (15)$$

where  $N_t$  and  $G_t$  are defined in eq(9) and eq(12), respectively. These update rules accomplish the goal of updating the number of local steps via  $E_t/B_t$  with  $\frac{E_{t+1}}{B_{t+1}} = \frac{E_t}{B_t} \exp(-\gamma_E \bar{N}_t - (\gamma_E - \gamma_B) \bar{G}_t)$ .

Typically, with  $\gamma_B \geq \gamma_E$ ,  $(\gamma_B - \gamma_E) \bar{G}_t$  becomes a tunable regularization term as discussed at the end of Section 3.3.3.

### 3.3.5 Client Sampling

We present our method, FATHOM, as shown in Algorithm 1. One practical factor we have not considered in our discussions is partial client sampling. For our implementation to handle the stochastic nature of client sampling, the metric  $\bar{\Delta}_{t-1}$  for calculating  $\bar{H}_t$  in eq(5) and  $\bar{N}_t$  in eq(9) is modified by a smoothing function for noise filtering, i.e.  $\bar{\Delta}_{t,sm} = \alpha \bar{\Delta}_{t-1,sm} + (1-\alpha) \bar{\Delta}_t$ , which is a single-pole infinite impulse response filter (Oppenheim and Schaffer [2009] Oppenheimer et al. [2009]) with no bias compensation. We use the notation "sm" for smoothed, and after many experiments, we decide to use  $\alpha = 0.5$  for all of our numerical results.

---

**Algorithm 1: FATHOM** :  $g_i(x)$  is defined in Assumptions 1, and  $m$  is the number of clients.

---

**Input:** Server initializes global model  $x_{t=1}$ ,  $T$  as the end communication round, and:

$$\bar{\Delta}_{t=0,sm} = 0; \alpha = 0.5; \gamma_\eta = 0.01; \gamma_E = 0.01; \gamma_B = 0.1$$

**Output:**  $x_T$ , as well as  $\eta_{L,t}$ ,  $E_t$  and  $B_t$  for all  $t \in [T]$

**for**  $t = 1, \dots, T$  **do**

    Sample client set  $S_t$  out of  $m$  clients.

    For each client  $i \in S_t$ , initialize:  $x_t^{i,k=0} = x_t$  and  $K_{t,i} = \lfloor \nu_i E_t / B_t \rfloor$ .

    Set  $\Delta_i = 0$ , and  $\phi_i = +\infty$ .

**for**  $k = 0, \dots, K_{t,i} - 1$  **do**

        For each client  $i$ , compute in parallel an unbiased stochastic gradient  $g_i(x_t^{i,k})$ .

        For each client  $i$ , calculate  $\phi_i = \min(\phi_i, g_i(x_t^{i,k}) \cdot \Delta_i)$  where  $\Delta_i = x_t^{i,k} - x_t$

        For each client  $i$ , update in parallel its local solution:  $x_t^{i,k+1} = x_t^{i,k} - \eta_{L,t} g_i(x_t^{i,k})$

**end**

    Server calculates  $\nu = \sum_{i \in S_t} \nu_i$ , where  $\nu_i$  is the size of client  $i$  dataset.

    Server calculates  $\bar{\Delta}_t = \sum_{i \in S_t} \Delta_i (\nu_i / \nu)$ ; see eq(2)

    Server updates global model  $x_{t+1} = x_t - \bar{\Delta}_t$

    Server calculates  $\bar{H}_t = \bar{N}_t = -\frac{\bar{\Delta}_t}{\|\bar{\Delta}_t\|} \cdot \frac{\bar{\Delta}_{t-1,sm}}{\|\bar{\Delta}_{t-1,sm}\|}$ , modified from eq(5) and eq(9)

    Server calculates  $\bar{G}_t$ ; see eq(12)

    Server updates client learning rate  $\eta_{L,t+1}$ , epochs,  $E_{t+1}$ , and batch size  $B_{t+1}$  for the next round; see eq(13), eq(14), and eq(15).

    Server updates  $\bar{\Delta}_{t,sm} = (1 - \alpha)\bar{\Delta}_t + \alpha\bar{\Delta}_{t-1,sm}$  for the next round

**end**

---

## 4 Theoretical Convergence

A standard approach to theoretical analysis of an online optimization method such as ours, is through analyzing the regret bound (Zinkevich [2003], Khodak et al. [2019], Kingma and Ba [2014], and Mokhtari et al. [2016]). Nonetheless, this approach does not tell us the impact on communication efficiency by the online updates introduced from FATHOM. Therefore, we take an alternative approach by extending the guarantees of FedAvg performance (Wang et al. [2021], Reddi et al. [2020], Gorbunov et al. [2020], Yang et al. [2021], Li et al. [2019], etc) to include both adaptive learning rate and adaptive number of local steps. We assume the special case in our analysis to have full client participation. We prove that adaptive learning rate and adaptive number of local steps does not impact asymptotic convergence, despite the given relaxed conditions.

### 4.1 Assumptions

**Assumption 3.** (*L-Lipschitz Continuous Gradient for Parameters  $x_t$* ) There exists a constant  $L > 0$ , such that  $\|\nabla f_i(x) - \nabla f_i(y)\| \leq L\|x - y\|$ ,  $\forall x, y \in \mathbb{R}^d$ , and  $i \in [m]$ , where  $x$  and  $y$  are the parameters in eq(1).

**Assumption 4.** (*Bounded Local Variance*) There exist a constant  $\sigma_L > 0$ , such that the variance of each local gradient estimator is bounded by  $\mathbb{E}\|\nabla f_i(x) - g_i(x)\|^2 \leq \sigma_L^2$ ,  $\forall x$ , and  $i \in [m]$ .

**Assumption 5.** (*Bounded Second Moment*) There exists a constant  $G > 0$ , such that  $\mathbb{E}_t\|\nabla f_i(x_t)\| \leq G$ ,  $i \in [m]$ ,  $\forall x_t$ .

### 4.2 Convergence Results

**Theorem 3.** Under Assumptions 1-5 and with full client participation, when FATHOM as shown in Algorithm 1 is used to find a solution  $x_*$  to the unconstrained problem defined in eq(1), the sequence of outputs  $\{x_t\}$  satisfies the following upper-bound, where, with slight abuse of notation,  $\mathcal{E} = \min_{t \in [T]} \mathbb{E}_t \|\nabla f(x_t)\|_2^2$ :

$$\mathcal{E}_{fathom} = \mathcal{O}\left(\sqrt{\frac{\sigma_L^2 + G^2}{mKT}} + \sqrt[3]{\frac{\sigma_L^2}{KT^2}} + \sqrt[3]{\frac{G^2}{T^2}}\right) \quad (16)$$

with the following conditions:  $\bar{\eta}_L = \min \left( \sqrt{\frac{2\beta_0 m D}{\beta_1 \bar{K} L T (\sigma_L^2 + G^2)}}, \sqrt[3]{\frac{\beta_0 D}{2.5\beta_2 \bar{K}^2 L^2 \sigma_L^2 T}}, \sqrt[3]{\frac{\beta_0 D}{2.5\beta_3 \bar{K}^3 L^2 G^2 T}} \right)$   
and  $\eta_{L,t} \leq 1/L$  for all  $t$ , where

$$\bar{\eta}_L \triangleq \frac{1}{T} \sum_{t=1}^T \eta_{L,t} \quad \text{and} \quad \bar{K} \triangleq \frac{1}{T} \sum_{t=1}^T K_t \quad (17)$$

and where

$$\beta_0 = \frac{\sum_t \eta_{L,t} K_t}{T [\frac{1}{T} \sum_t \eta_{L,t}] [\frac{1}{T} \sum_t K_t]}, \quad \beta_1 = \frac{\sum_t \eta_{L,t} K_t [\frac{1}{T} \sum_t \eta_{L,t}]}{\sum_t \eta_{L,t}^2 K_t} \quad (18)$$

$$\beta_2 = \frac{\sum_t \eta_{L,t} K_t [\frac{1}{T} \sum_t \eta_{L,t}]^2 [\frac{1}{T} \sum_t K_t]}{\sum_t \eta_{L,t}^3 K_t^2}, \quad \beta_3 = \frac{\sum_t \eta_{L,t} K_t [\frac{1}{T} \sum_t \eta_{L,t}]^2 [\frac{1}{T} \sum_t K_t]^2}{\sum_t \eta_{L,t}^3 K_t^3} \quad (19)$$

We leave the proof in the Appendix beginning in eq(29).

The values of  $\beta_0, \beta_1, \beta_2, \beta_3$ , and  $\beta_4$  are dependent on the relative changes over the adaptive process of these components, according to Chebyshev's Sum Inequalities (Hardy et al. [1988]). A special case is when these quantities equal to 1 when both  $\eta_{L,t}$  and  $K_t$  are constant, which recovers the standard upperbound for FedAvg from eq(16).

**Remark 2.** The definitions in eq(17) combined with the conditions for  $\bar{\eta}_L$  above is called the relaxed conditions in this paper for the hyperparameters  $\eta_{L,t}$  and  $K_t$ . The values of  $\eta_{L,t}$  and  $K_t$  are adaptive during the optimization process between rounds  $t = 1$  and  $t = T$ , as long as the above conditions are satisfied for the guarantee in eq(31) to hold. This relaxation presents opportunities for a scheme such as FATHOM to exploit for performance gain. For example, suppose  $T$  approaches  $\infty$  for a prolonged training session. Then  $\bar{\eta}_L$  would necessarily be sufficiently small for  $\mathcal{E}_{fathom}$  to be bounded by eq(16). However, for early rounds i.e. small  $t$  values,  $\eta_{L,t} \leq T \bar{\eta}_L$  can be reasonably large and still can satisfy eq(17), for the benefit of accelerated learning and convergence progress early on. Similar strategy can be used for number of local steps to minimize local computations towards later rounds. In any case, these strategies are mere guidelines meant to remain within the worst case guarantee. However, Theorem 3 offers the flexibility otherwise not available. We will now show the empirical performance gained by taking advantage of this flexibility.

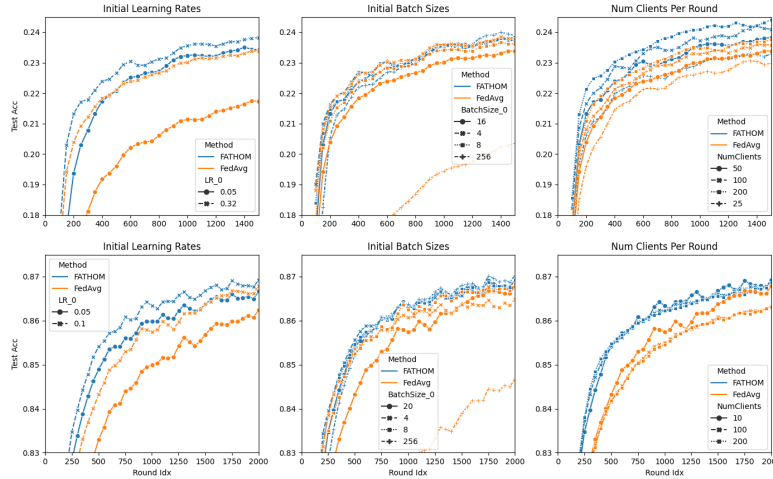

Figure 1: Test Accuracy Performance with various values of initial client learning rate ( $LR_0$ ), initial batch size ( $BatchSize_0$ ), and number of clients per round ( $NumClients$ ). Top row: FSO sims. Bottom row: FEMNIST sims. Baseline values for FEMNIST:  $LR_0=0.1$ ,  $BatchSize_0=20$ ,  $NumClients=10$ . Baseline values for FSO:  $LR_0=0.32$ ,  $BatchSize_0=16$ ,  $NumClients=50$ .



## 5 Empirical Evaluation and Numerical Results

We present an empirical evaluation of FATHOM proposed in Section 3 and outlined in Algorithm 1. We conduct extensive simulations of federated learning in character recognition on the federated EMNIST-62 dataset (FEMNIST) (Cohen et al. [2017]) with a CNN, and in natural language next-word prediction on the federated Stack Overflow dataset (FSO) (TensorFlow-Federated-Authors [2019]) with a RNN. We defer most of the details of the experiment setup in Appendix Section C.1. Our choice of datasets, tasks and models, are exactly the same as the "EMNIST CR" task and the "SO NWP" task from Reddi et al. [2020]. See Figure 1 and Table 1 and their captions for details of the experiment results. Our evaluation lacks comparison with a few one-shot FL HPO methods discussed earlier in the paper because of a lack of standardized benchmark (until FedHPO- B Wang et al. [2022] was published concurrently as this work) to be fair and comprehensive.

The underlying principle behind these experiments is evaluating the robustness of FATHOM versus FedAvg under various initial settings, to mirror realistic usage scenarios where the optimal hyperparameter values are unknown. For FATHOM, we start with the same initial hyperparameter values as FedAvg. The test accuracy progress with respect to communication rounds is shown in Figure 1 from these experiments. We also pick test accuracy targets for the two tasks. For FEMNIST CR we use 86% and for FSO NWP we use 23%. Table 1 shows a table of resource utilization metrics with respect to reaching these targets in our experiments, highlighting the communication efficiency as well as reduction in local computation from FATHOM in comparison to FedAvg. To our knowledge, we are the first to show gain from an online HPO procedure over a well-tuned equivalent procedure with fixed hyperparameter values.

The federated learning simulation framework on which we build our algorithms for our experiments is FedJAX (Ro et al. [2021]) which is under the Apache License. The server that runs the experiments is equipped with Nvidia Tesla V100 SXM2 GPUs.

Table 1: Resource utilization in communication and local computation to reach specified test accuracy target for each task. All evaluations are run for ten trials. Bold numbers highlight better performance. NA means target was not reached within 1500 rounds for FSO NWP and 2000 rounds for FEMNIST CR, in any of our trials. LR\_0 is initial client learning rate, BS\_0 is initial batch size, and NCPR is number of clients per round. All experiments use baseline initial values except where indicated. For clarification, M is used in place for "million", and K for "thousand".

Baseline\_fso : (LR\_0 = 0.32, BS\_0 = 16, NCPR = 50)

Baseline\_femnist : (LR\_0 = 0.10, BS\_0 = 20, NCPR = 10)

| Tasks                    | Experiments      | Number of Rounds To Reach Target Test Accuracy |                 | Local Gradients Calculated To Reach Target Test Accuracy |                   |
|--------------------------|------------------|------------------------------------------------|-----------------|----------------------------------------------------------|-------------------|
|                          |                  | FATHOM                                         | FedAvg          | FATHOM                                                   | FedAvg            |
| FSO NWP<br>Target@23%    | Baseline_fso     | <b>562 ± 12</b>                                | 971 ± 11        | <b>85M ± 1.2M</b>                                        | 124M ± 1.3M       |
|                          | LR_0 = 0.05      | <b>871 ± 7</b>                                 | NA              | <b>138M ± 3.2M</b>                                       | NA                |
|                          | BS_0 = 4         | 758 ± 43                                       | <b>580 ± 18</b> | 93M ± 2.8M                                               | <b>74M ± 2.5M</b> |
|                          | BS_0 = 256       | <b>801 ± 28</b>                                | NA              | <b>174M ± 18M</b>                                        | NA                |
|                          | NCPR = 25        | <b>970 ± 49</b>                                | 1283 ± 33       | <b>63M ± 2.7M</b>                                        | 82M ± 3.8M        |
|                          | NCPR = 200       | <b>396 ± 17</b>                                | 684 ± 26        | <b>280M ± 45M</b>                                        | 350M ± 13M        |
| FEMNIST CR<br>Target@86% | Baseline_femnist | <b>739 ± 24</b>                                | 1098 ± 15       | <b>1.5M ± 36K</b>                                        | 2.2M ± 64K        |
|                          | LR_0 = 0.05      | <b>905 ± 21</b>                                | 1574 ± 19       | <b>1.7M ± 28K</b>                                        | 3.1M ± 28K        |
|                          | BS_0 = 4         | <b>708 ± 17</b>                                | 885 ± 41        | <b>1.2M ± 28K</b>                                        | 1.7M ± 88K        |
|                          | BS_0 = 256       | <b>736 ± 20</b>                                | NA              | <b>2.0M ± 44K</b>                                        | NA                |
|                          | NCPR = 100       | <b>777 ± 16</b>                                | 1436 ± 18       | <b>22M ± 0.27M</b>                                       | 28M ± 0.39K       |
|                          | NCPR = 200       | <b>790 ± 16</b>                                | 1481 ± 33       | <b>57M ± 1.0M</b>                                        | 59M ± 1.3M        |

## 6 Conclusion and Future Work

In this work, we propose FATHOM for adaptive hyperparameters in federated optimization, specifically for FedAvg. We analyze theoretically and evaluate empirically its potential benefits in convergence behavior as measured in test accuracy, and in reduction of local computations, by automatically adapting the three main hyperparameters of FedAvg: client learning rate, and number of local steps via epochs and batch size. An example of future efforts to extend this work is using a standardized benchmark such as Wang et al. [2022] for performance comparison against other FL HPO methods.

## References

- E. Amid, R. Anil, C. Fifty, and M. K. Warmuth. Step-size adaptation using exponentiated gradient updates, 2022.
- A. G. Baydin, R. Cornish, D. M. Rubio, M. Schmidt, and F. Wood. Online learning rate adaptation with hypergradient descent, 2017.
- H. Cai, L. Zhu, and S. Han. ProxylessNAS: Direct neural architecture search on target task and hardware. In *International Conference on Learning Representations*, 2019. URL <https://arxiv.org/pdf/1812.00332.pdf>.
- Z. Charles and J. Konečný. On the outsized importance of learning rates in local update methods, 2020.
- G. Cohen, S. Afshar, J. Tapson, and A. Van Schaik. Emnist: Extending mnist to handwritten letters. In *2017 international joint conference on neural networks (IJCNN)*, pages 2921–2926. IEEE, 2017.
- Z. Dai, K. H. Low, and P. Jaillet. Federated bayesian optimization via thompson sampling, 2020.
- Z. Dai, B. K. H. Low, and P. Jaillet. Differentially private federated bayesian optimization with distributed exploration, 2021.
- U. Ghai, E. Hazan, and Y. Singer. Exponentiated gradient meets gradient descent, 2019.
- E. Gorbunov, F. Hanzely, and P. Richtárik. Local sgd: Unified theory and new efficient methods, 2020.
- P. Guo, D. Yang, A. Hatamizadeh, A. Xu, Z. Xu, W. Li, C. Zhao, D. Xu, S. Harmon, E. Turkbey, et al. Auto-fedrl: Federated hyperparameter optimization for multi-institutional medical image segmentation. *arXiv preprint arXiv:2203.06338*, 2022.
- G. Hardy, J. Littlewood, and G. Pólya. *Inequalities*. Cambridge Mathematical Library. Cambridge University Press, 1988. ISBN 9781107647398. URL <https://books.google.com/books?id=EfvZAQAAQBAJ>.
- S. Holly, T. Hiessl, S. R. Lakani, D. Schall, C. Heitzinger, and J. Kemnitz. Evaluation of hyperparameter-optimization approaches in an industrial federated learning system, 2021.
- M. Khodak, M.-F. Balcan, and A. Talwalkar. Adaptive gradient-based meta-learning methods, 2019.
- M. Khodak, R. Tu, T. Li, L. Li, N. Balcan, V. Smith, and A. Talwalkar. Federated hyperparameter tuning: Challenges, baselines, and connections to weight-sharing. In A. Beygelzimer, Y. Dauphin, P. Liang, and J. W. Vaughan, editors, *Advances in Neural Information Processing Systems*, 2021. URL <https://openreview.net/forum?id=p99rWde9fVJ>.
- D. P. Kingma and J. Ba. Adam: A method for stochastic optimization, 2014.
- D. P. Kingma and M. Welling. Auto-encoding variational bayes, 2013.
- L. Li, M. Khodak, M.-F. Balcan, and A. Talwalkar. Geometry-aware gradient algorithms for neural architecture search, 2020.
- X. Li, K. Huang, W. Yang, S. Wang, and Z. Zhang. On the convergence of fedavg on non-iid data, 2019.
- Y.-H. Li and V. Cevher. Convergence of the exponentiated gradient method with armijo line search. *Journal of Optimization Theory and Applications*, 181(2):588–607, Dec 2018. ISSN 1573-2878. doi: 10.1007/s10957-018-1428-9. URL <http://dx.doi.org/10.1007/s10957-018-1428-9>.
- H. B. McMahan, E. Moore, D. Ramage, S. Hampson, and B. A. y Arcas. Communication-efficient learning of deep networks from decentralized data, 2016.
- A. Mokhtari, S. Shahrampour, A. Jadbabaie, and A. Ribeiro. Online optimization in dynamic environments: Improved regret rates for strongly convex problems. *2016 IEEE 55th Conference on Decision and Control (CDC)*, Dec 2016. doi: 10.1109/cdc.2016.7799379. URL <http://dx.doi.org/10.1109/cdc.2016.7799379>.
- H. Mostafa. Robust federated learning through representation matching and adaptive hyper-parameters, 2019.
- K. Murota. Discrete convex analysis. *Mathematical Programming*, 83:313–371, 1998.
- A. V. Oppenheim and R. W. Schaffer. *Discrete-Time Signal Processing*. Prentice Hall Press, USA, 3rd edition, 2009. ISBN 0131988425.

371 H. Pham, M. Guan, B. Zoph, Q. Le, and J. Dean. Efficient neural architecture search via parameters sharing.  
 372 In J. Dy and A. Krause, editors, *Proceedings of the 35th International Conference on Machine Learning*,  
 373 volume 80 of *Proceedings of Machine Learning Research*, pages 4095–4104. PMLR, 10–15 Jul 2018. URL  
 374 <https://proceedings.mlr.press/v80/pham18a.html>.

375 S. Reddi, Z. Charles, M. Zaheer, Z. Garrett, K. Rush, J. Konečný, S. Kumar, and H. B. McMahan. Adaptive  
 376 federated optimization, 2020.

377 J. H. Ro, A. T. Suresh, and K. Wu. Fedjax: Federated learning simulation with jax. *arXiv preprint*  
 378 *arXiv:2108.02117*, 2021.

379 TensorFlow-Federated-Authors. Tensorflow federated stack overflow dataset, 2019. URL [https://www.](https://www.tensorflow.org/federated/api_docs/python/tff/simulation/datasets/stackoverflow)  
 380 [tensorflow.org/federated/api\\_docs/python/tff/simulation/datasets/stackoverflow](https://www.tensorflow.org/federated/api_docs/python/tff/simulation/datasets/stackoverflow).

381 J. Wang and G. Joshi. Adaptive communication strategies to achieve the best error-runtime trade-off in local-  
 382 update SGD, 2018.

383 J. Wang, Z. Charles, Z. Xu, G. Joshi, H. B. McMahan, B. A. y Arcas, M. Al-Shedivat, G. Andrew, S. Avestimehr,  
 384 K. Daly, D. Data, S. Diggavi, H. Eichner, A. Gadhihar, Z. Garrett, A. M. Girgis, F. Hanzely, A. Hard, C. He,  
 385 S. Horvath, Z. Huo, A. Ingerman, M. Jaggi, T. Javidi, P. Kairouz, S. Kale, S. P. Karimireddy, J. Konecny,  
 386 S. Koyejo, T. Li, L. Liu, M. Mohri, H. Qi, S. J. Reddi, P. Richtarik, K. Singhal, V. Smith, M. Soltanolkotabi,  
 387 W. Song, A. T. Suresh, S. U. Stich, A. Talwalkar, H. Wang, B. Woodworth, S. Wu, F. X. Yu, H. Yuan,  
 388 M. Zaheer, M. Zhang, T. Zhang, C. Zheng, C. Zhu, and W. Zhu. A field guide to federated optimization, 2021.

389 Z. Wang, W. Kuang, C. Zhang, B. Ding, and Y. Li. Fedhpo-b: A benchmark suite for federated hyperparameter  
 390 optimization, 2022.

391 R. J. Williams. Simple statistical gradient-following algorithms for connectionist reinforcement learning.  
 392 *Mach. Learn.*, 8(3–4):229–256, may 1992. ISSN 0885-6125. doi: 10.1007/BF00992696. URL [https:](https://doi.org/10.1007/BF00992696)  
 393 [//doi.org/10.1007/BF00992696](https://doi.org/10.1007/BF00992696).

394 H. Yang, M. Fang, and J. Liu. Achieving linear speedup with partial worker participation in non-iid federated  
 395 learning, 2021.

396 Y. Zhou, P. Ram, T. Salonidis, N. Baracaldo, H. Samulowitz, and H. Ludwig. Single-shot hyper-parameter  
 397 optimization for federated learning: A general algorithm and analysis, 2022.

398 M. Zinkevich. Online convex programming and generalized infinitesimal gradient ascent. In *Proceedings of*  
 399 *the Twentieth International Conference on International Conference on Machine Learning*, ICML’03, page  
 400 928–935. AAAI Press, 2003. ISBN 1577351894.

## 401 Checklist

402 The checklist follows the references. Please read the checklist guidelines carefully for information on  
 403 how to answer these questions. For each question, change the default **[TODO]** to **[Yes]**, **[No]**, or  
 404 **[N/A]**. You are strongly encouraged to include a **justification to your answer**, either by referencing  
 405 the appropriate section of your paper or providing a brief inline description. For example:

- 406 • Did you include the license to the code and datasets? **[Yes]** The code is MIT licensed.

407 Please do not modify the questions and only use the provided macros for your answers. Note that the  
 408 Checklist section does not count towards the page limit. In your paper, please delete this instructions  
 409 block and only keep the Checklist section heading above along with the questions/answers below.

### 410 1. For all authors...

- 411 (a) Do the main claims made in the abstract and introduction accurately reflect the paper’s  
 412 contributions and scope? **[Yes]**
- 413 (b) Did you describe the limitations of your work? **[Yes]** Please refer to Sections 2 and 6
- 414 (c) Did you discuss any potential negative societal impacts of your work? **[No]** Not  
 415 specifically, but it is alluded to how FL applications have social implications in the  
 416 introductory section.
- 417 (d) Have you read the ethics review guidelines and ensured that your paper conforms to  
 418 them? **[Yes]**

- 419 2. If you are including theoretical results...
- 420 (a) Did you state the full set of assumptions of all theoretical results? [Yes] Please refer to
- 421 Assumptions 1, 2, 3, 4, and 5
- 422 (b) Did you include complete proofs of all theoretical results? [Yes] Yes, in the supple-
- 423 mental material.
- 424 3. If you ran experiments...
- 425 (a) Did you include the code, data, and instructions needed to reproduce the main exper-
- 426 imental results (either in the supplemental material or as a URL)? [Yes] Yes, in the
- 427 supplemental material.
- 428 (b) Did you specify all the training details (e.g., data splits, hyperparameters, how they
- 429 were chosen)? [Yes] Yes, in the supplemental material.
- 430 (c) Did you report error bars (e.g., with respect to the random seed after running experi-
- 431 ments multiple times)? [Yes] Yes, see Table 1
- 432 (d) Did you include the total amount of compute and the type of resources used (e.g., type
- 433 of GPUs, internal cluster, or cloud provider)? [Yes] Yes, it is mentioned in Section 5
- 434 4. If you are using existing assets (e.g., code, data, models) or curating/releasing new assets...
- 435 (a) If your work uses existing assets, did you cite the creators? [Yes] Yes, it is mentioned
- 436 in Section 5
- 437 (b) Did you mention the license of the assets? [Yes] Yes, it is mentioned in Section 5
- 438 (c) Did you include any new assets either in the supplemental material or as a URL? [Yes]
- 439 Yes, in the supplemental material.
- 440 (d) Did you discuss whether and how consent was obtained from people whose data you're
- 441 using/curating? [N/A]
- 442 (e) Did you discuss whether the data you are using/curating contains personally identifiable
- 443 information or offensive content? [No]
- 444 5. If you used crowdsourcing or conducted research with human subjects...
- 445 (a) Did you include the full text of instructions given to participants and screenshots, if
- 446 applicable? [N/A]
- 447 (b) Did you describe any potential participant risks, with links to Institutional Review
- 448 Board (IRB) approvals, if applicable? [N/A]
- 449 (c) Did you include the estimated hourly wage paid to participants and the total amount
- 450 spent on participant compensation? [N/A]

## 451 A Supplementary Materials for Section 3 - Methodology

452 This supplementary section contains missing proofs from Section 3.

453 **Theorem 1.** When a piecewise function  $L_t$  is defined for every value of  $K_0 \in [K]$  on  $l$ , such that  
 454  $0.0 \leq l < 1.0$ , we claim, under Assumption 2, that the following is a subgradient of  $f(x_t)$  at  
 455  $K_t = K_0$ :

$$\frac{\partial L_t}{\partial l} = \nabla f(x_t) \cdot \left( -\eta_{L,t} \sum_{i=1}^m g_i(x_{t-1}^{i,K_t-1}) \frac{\nu_i}{\nu} \right) \quad (6)$$

456 where  $l$  represents the marginal fraction of local steps beyond  $K_0$ . We leave the proof (with an  
 457 illustration in Figure 2) in the Appendix section beginning in eq(20).

458 *Proof.* We clarify this quantity by re-writing  $L_{K_0}(l) = L_t$  and its definition (with some abuse of  
 459 notation):

$$L_{K_0}(l) = f(x_t) \Big|_{K=K_0+l} = f\left(x_{t-1} - \eta_{L,t} \sum_{i=1}^m \frac{\nu_i}{\nu} \sum_{k=0}^{K_0-2} (g_i(x_{t-1}^{i,k}) + l g_i(x_{t-1}^{i,K_0-1}))\right) \quad (20)$$

460 for  $K_0 \geq 2$ , and  $L_{K_0}(l) = f(x_{t-1} - \eta_{L,t} \sum_{i=1}^m l g_i(x_{t-1}^{i,k=0}) \frac{\nu_i}{\nu})$  for  $K_0 = 1$ , where  $l$  represents the  
 461 marginal fraction of local steps  $K_0$ . Then, by convexity from Assumption 2, and by recalling that  $l$   
 462 represents the marginal fraction of local steps, we claim that:

$$\frac{\partial L_{K_0}(l)}{\partial l} \leq \left[ \frac{f(x_t)|_{K=K_0+l} - f(x_t)|_{K=K_0}}{l} \right] \quad (21)$$

463 From this result, we conclude that  $\frac{\partial L_{K_0}(l)}{\partial l}$  is a subgradient of  $f(x_t)$  at  $K = K_0$ . With abuse of  
 464 notation by setting  $K_0 = K_t$  and therefore  $L_t = L_{K_0}(l)$ , we further derive  $\frac{\partial L_t}{\partial l}$  by breaking it down  
 465 similarly as eq(4), leads us to:

$$\frac{\partial L_t}{\partial l} = \nabla f(x_t) \cdot \frac{\partial \left( -\eta_{L,t} \sum_{i=1}^m \frac{\nu_i}{\nu} \sum_{k=0}^{K_t-2} l g_i(x_{t-1}^{i,K_t-1}) \right)}{\partial l} \quad (22)$$

$$= \nabla f(x_t) \cdot \left( -\frac{\eta_{L,t}}{m} \sum_{i=1}^m g_i(x_{t-1}^{i,K_t-1}) \right) \quad (23)$$

466 The above result concludes the proof for Theorem 1.

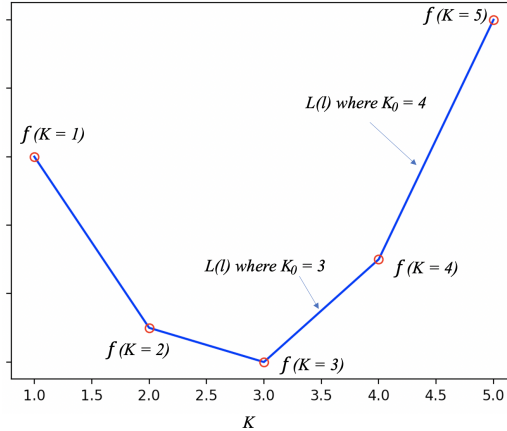

Figure 2: Illustration of piecewise function  $L_{K_0}(l)$  and  $f(K)$ , where  $f(K) = f(x, c)$  from eq 3, and where we ignore  $\eta_L$  and  $x_t$  for this discussion. Notice  $K$  is only defined on  $\{K \mid K \geq 1\}$ . Hence  $f(K)$  are illustrated as red dots. However, since  $0.0 \leq l < 1.0$ ,  $L_{K_0}(l)$  extends from  $f(K_0)$  to  $f(K_0 + 1)$ .

**Theorem 2.** When a piecewise function  $J_t$  is defined for every value of  $K_0 \in [K]$  on  $l$ , such that  $0.0 \leq l < 1.0$ , we claim, under Assumption 2, that the following is a subgradient of  $\sum_{i=1}^m f_i(x_t^{i,K_t})$  at  $K_t = K_0$ :

$$\frac{\partial J_t}{\partial l} = -\eta_{L,t} \sum_{i=1}^m \frac{\nu_i}{\nu} \mathbb{E}[g_i(x_t^{i,K_0-1})] \cdot g_i(x_t^{i,K_t}) \approx -\eta_{L,t} \sum_{i=1}^m \frac{\nu_i}{\nu} \sum_{k=0}^{K_t-1} g_i(x_t^{i,k}) \cdot g_i(x_t^{i,K_t}) \quad (10)$$

where  $l$  represents the marginal fraction of local steps beyond  $K_0$ . We leave the proof in the Appendix section beginning in eq(24).

*Proof.* We clarify this quantity by re-writing  $J_{K_0}(l) = J_t$  and its definition (with some abuse of notation):

$$J_{K_0}(l) = \sum_{i=1}^m \frac{\nu_i}{\nu} f_i(x_t^{i,K_0-1}) \Big|_{K=K_0+l} = \sum_{i=1}^m \frac{\nu_i}{\nu} f_i(x_t^{i,K_0-1} - l(\eta_{L,t} g_i(x_t^{i,K_0}))) \quad (24)$$

for  $K_0 \geq 1$ , where  $l$  represents the marginal fraction of local steps  $K_0$ . Then, by convexity from Assumption 2, and by recalling that  $l$  represents the marginal fraction of local steps, we claim that:

$$\frac{\partial J_{K_0}(l)}{\partial l} \leq \left[ \frac{\sum_{i=1}^m \frac{\nu_i}{\nu} (f_i(x_t^{i,K_0-1})|_{K=K_0+l} - f_i(x_t^{i,K_0-1})|_{K=K_0})}{l} \right] \quad (25)$$

From this result, we conclude that  $\frac{\partial J_{K_0}(l)}{\partial l}$  is a subgradient of  $f(x_t)$  at  $K = K_0$ . With abuse of notation by setting  $K_0 = K_t$  and therefore  $L_t = L_{K_0}(l)$ , we further derive  $\frac{\partial J_t}{\partial l}$  by breaking it down similarly as eq(4), leads us to:

$$\frac{\partial J_t}{\partial l} = \sum_{i=1}^m \frac{\nu_i}{\nu} \nabla f_i(x_t^{i,K_t-1}) \cdot \frac{\partial(-l\eta_{L,t}g_i(x_t^{i,K_t}))}{\partial l} \quad (26)$$

$$\stackrel{(J1)}{=} -\eta_{L,t} \sum_{i=1}^m \frac{\nu_i}{\nu} \mathbb{E}[g_i(x_t^{i,K_0-1})] \cdot g_i(x_t^{i,K_t}) \quad (27)$$

$$\stackrel{(J2)}{\approx} -\eta_{L,t} \sum_{i=1}^m \frac{\nu_i}{\nu} \sum_{k=0}^{K_t-1} g_i(x_t^{i,k}) \cdot g_i(x_t^{i,K_t}) \quad (28)$$

where J1 follows from Assumption 1, and J2 crudely assumes  $\nabla f_i(x_t^{i,K_t-1}) \approx \sum_{k=0}^{K_t-1} g_i(x_t^{i,k})$  from the additional averaging. The above result concludes the proof for Theorem 2.  $\square$

## B Supplementary Materials for Section 4 - Theoretical Convergence

This supplementary section contains all the missing proofs from Section 4.

**Theorem 3.** Under Assumptions 1-5 and with full client participation, when FATHOM as shown in Algorithm 1 is used to find a solution  $x_*$  to the unconstrained problem defined in eq(1), the sequence of outputs  $\{x_t\}$  satisfies the following upper-bound, where, with slight abuse of notation,  $\mathcal{E} = \min_{t \in [T]} \mathbb{E}_t \|\nabla f(x_t)\|_2^2$ :

$$\mathcal{E}_{fathom} = \mathcal{O}\left(\sqrt{\frac{\sigma_L^2 + G^2}{m\bar{K}T}} + \sqrt[3]{\frac{\sigma_L^2}{\bar{K}T^2}} + \sqrt[3]{\frac{G^2}{T^2}}\right) \quad (16)$$

with the following conditions:  $\bar{\eta}_L = \min\left(\sqrt{\frac{2\beta_0 m D}{\beta_1 \bar{K} L T (\sigma_L^2 + G^2)}}, \sqrt[3]{\frac{\beta_0 D}{2.5\beta_2 \bar{K}^2 L^2 \sigma_L^2 T}}, \sqrt[3]{\frac{\beta_0 D}{2.5\beta_3 \bar{K}^3 L^2 G^2 T}}\right)$

and  $\eta_{L,t} \leq 1/L$  for all  $t$ , where

$$\bar{\eta}_L \triangleq \frac{1}{T} \sum_{t=1}^T \eta_{L,t} \quad \text{and} \quad \bar{K} \triangleq \frac{1}{T} \sum_{t=1}^T K_t \quad (17)$$

490 and where

$$\beta_0 = \frac{\sum_t \eta_{L,t} K_t}{T[\frac{1}{T} \sum_t \eta_{L,t}][\frac{1}{T} \sum_t K_t]}, \quad \beta_1 = \frac{\sum_t \eta_{L,t} K_t [\frac{1}{T} \sum_t \eta_{L,t}]}{\sum_t \eta_{L,t}^2 K_t} \quad (18)$$

$$\beta_2 = \frac{\sum_t \eta_{L,t} K_t [\frac{1}{T} \sum_t \eta_{L,t}]^2 [\frac{1}{T} \sum_t K_t]}{\sum_t \eta_{L,t}^3 K_t^2}, \quad \beta_3 = \frac{\sum_t \eta_{L,t} K_t [\frac{1}{T} \sum_t \eta_{L,t}]^2 [\frac{1}{T} \sum_t K_t]^2}{\sum_t \eta_{L,t}^3 K_t^3} \quad (19)$$

491 We leave the proof in the Appendix beginning in eq(29).

492 *Proof.* We begin by first defining the following:

493 By re-writing eq(38) from Lemma 1 with adaptive  $\eta_{L,t}$  and  $K_t$ , we end up with:

$$\sum_{t=0}^{T-1} \frac{\eta_{L,t} K_t}{2} \mathbb{E}_t \|\nabla f(x_t)\|^2 \leq f(x_0) - f(x_T) + \sum_{t=0}^{T-1} \eta_{L,t} K_t \left[ \frac{\eta_{L,t} L}{2m} (\sigma_L^2 + G^2) + \frac{5\eta_{L,t}^2 K_t L^2}{2} (\sigma_L^2 + K_t G^2) \right] \quad (29)$$

494 After re-arranging:

$$\min_{t \in [T]} \mathbb{E}_t \|\nabla f(x_t)\|^2 \leq \underbrace{\frac{2D}{\sum_t \eta_{L,t} K_t}}_{\text{progress}} + \underbrace{\frac{L \sum_t \eta_{L,t}^2 K_t}{m \sum_t \eta_{L,t} K_t} (\sigma_L^2 + G^2)}_{\text{deviation 1}} + \underbrace{\frac{5L^2 \sum_t \eta_{L,t}^3 K_t^2}{\sum_t \eta_{L,t} K_t} \sigma_L^2}_{\text{deviation 2}} + \underbrace{\frac{5L^2 \sum_t \eta_{L,t}^3 K_t^3}{\sum_t \eta_{L,t} K_t} G^2}_{\text{deviation 3}} \quad (30)$$

495 which is followed by:

$$\mathcal{E}_{fathom} \leq \underbrace{\frac{2\beta_0 D}{\bar{\eta}_L \bar{K} T}}_{\text{progress}} + \underbrace{\frac{\beta_1 \bar{\eta}_L L}{m} (\sigma_L^2 + G^2)}_{\text{deviation 1}} + \underbrace{5\beta_2 \bar{\eta}_L^2 \bar{K} L^2 \sigma_L^2}_{\text{deviation 2}} + \underbrace{5\beta_3 \bar{\eta}_L^2 \bar{K}^2 L^2 G^2}_{\text{deviation 3}} \quad (31)$$

496 We have one progress term, and three deviation terms, similar to the labeling scheme in the convex  
 497 result from Wang et al. [2021]. Typically, one of these terms dominates during the course of the  
 498 optimization process, where it is desirable to never let one of the deviation terms to become dominant.  
 499 When we set each of the deviation terms to be equal to the progress term, we recover the bound  
 500 shown in eq(16) when the conditions are met. This concludes the proof for Theorem 3.  $\square$

501 **Lemma 1.** Under Assumptions 1-5 and with full client participation, when FedAvg with constant  
 502 hyperparameters is used to find a solution  $x_*$  to the unconstrained problem defined in eq(1), the  
 503 sequence of outputs  $\{x_t\}$  satisfies the following upper-bound, where, with slight abuse of notation,  
 504  $\mathcal{E} = \min_{t \in [T]} \mathbb{E}_t \|\nabla f(x_t)\|_2^2$ :

$$\min_{t \in [T]} \mathbb{E}_t \|\nabla f(x_t)\|^2 \leq \underbrace{\frac{2D}{\eta_L K T}}_{\text{progress}} + \underbrace{\frac{\eta_L L}{m} (\sigma_L^2 + G^2)}_{\text{deviation 1}} + \underbrace{5\eta_L^2 K L^2 \sigma_L^2}_{\text{deviation 2}} + \underbrace{5\eta_L^2 K^2 L^2 G^2}_{\text{deviation 3}} \quad (32)$$

505 where  $D = f(x_0) - f(x_T) = f(x_0) - f(x_*)$  with  $x_*$  being the fixed point solution discussed in  
 506 Section 4.1. Eq(32) has one progress term and three deviation terms, where  $\eta_L \leq \frac{1}{L}$  needs to hold  
 507 for client local gradient descent to guarantee local progress.

508 *Proof.* We start proving convergence of the non-convex problem by bounding the progress made  
 509 in the loss function within a single round, loosely following the beginning steps from the Proof of  
 510 Theorem 1 in Yang et al [2021]:

$$\mathbb{E}_t[f(x_{t+1})] \leq \mathbb{E}_t[f(x_t) + \langle \nabla f(x_t), \mathbb{E}_t(x_{t+1} - x_t) \rangle] + \frac{L}{2} \mathbb{E}_t \|x_{t+1} - x_t\|^2 \quad (33)$$

$$= \mathbb{E}_t[f(x_t) + \langle \nabla f(x_t), \mathbb{E}_t[\bar{\Delta}_t + \eta_L K \nabla f(x_t) - \eta_L K \nabla f(x_t)] \rangle] + \frac{L}{2} \mathbb{E}_t \|\bar{\Delta}_t\|^2 \quad (34)$$

$$= \mathbb{E}_t[f(x_t) - \eta_L K \|\nabla f(x_t)\|^2] + \underbrace{\langle \nabla f(x_t), \mathbb{E}_t[\bar{\Delta}_t + \eta_L K \nabla f(x_t)] \rangle}_{A_1} + \frac{L}{2} \underbrace{\mathbb{E}_t \|\bar{\Delta}_t\|^2}_{A_2} \quad (35)$$

By using results from Lemma 2 and Lemma 3, we have what follows:

$$\mathbb{E}_t[f(x_{t+1})] \leq \mathbb{E}_t[f(x_t)] - \frac{\eta_L K}{2} \|\nabla f(x_t)\|^2 + \frac{5\eta_L^3 K^2 L^2}{2} (\sigma_L^2 + KG^2) + \frac{L\eta_L^2 K}{2m} (\sigma_L^2 + G^2) \quad (36)$$

Therefore, in order to guarantee progress in each round, the following condition is required to hold true:

$$\|\nabla f(x_t)\|^2 \geq 5\eta_L^2 KL^2 (\sigma_L^2 + KG^2) + \frac{L\eta_L}{m} (\sigma_L^2 + G^2) \quad (37)$$

Continuing from eq(36), and summing telescopically, we end up with:

$$\sum_{t=0}^{T-1} \frac{\eta_L K}{2} \mathbb{E}_t \|\nabla f(x_t)\|^2 \leq f(x_0) - f(x_T) + T\eta_L K \left[ \frac{\eta_L L}{2m} (\sigma_L^2 + G^2) + \frac{5\eta_L^2 KL^2}{2} (\sigma_L^2 + KG^2) \right] \quad (38)$$

where  $D = f(x_0) - f(x_T) = f(x_0) - f(x_*)$  with  $x_*$  being the fixed point solution discussed in Section 4.1. This concludes the proof of Lemma 1.  $\square$

**Lemma 2.** Under Assumptions 1-5 and with full client participation, we claim the following is true:

$$A_1 \leq \frac{\eta_L K}{2} \|\nabla f(x)\|^2 + \frac{5K^2 \eta_L^3 L^2}{2} (\sigma_L^2 + KG^2) \quad (39)$$

*Proof.* We start by following most of the initial steps from the Proof of Theorem 1 in Yang et al [2021]:

$$A_1 = \langle \nabla f(x_t), \mathbb{E}_t[\bar{\Delta}_t + \eta_L K \nabla f(x_t)] \rangle \quad (40)$$

$$= \left\langle \nabla f(x_t), \mathbb{E}_t \left[ -\frac{1}{m} \sum_{i=1}^m \sum_{k=0}^{K-1} \eta_L g_i(x_t^{i,k}) + \eta_L K \nabla f(x_t) \right] \right\rangle \quad (41)$$

$$= \left\langle \nabla f(x_t), \mathbb{E}_t \left[ -\frac{1}{m} \sum_{i=1}^m \sum_{k=0}^{K-1} \eta_L \nabla f_i(x_t^{i,k}) + \eta_L K \frac{1}{m} \sum_{i=1}^m \nabla f_i(x_t) \right] \right\rangle \quad (42)$$

$$= \left\langle \sqrt{\eta_L K} \nabla f(x_t), -\frac{\sqrt{\eta_L}}{m\sqrt{K}} \mathbb{E}_t \sum_{i=1}^m \sum_{k=0}^{K-1} (\nabla f_i(x_t^{i,k}) - \nabla f_i(x_t)) \right\rangle \quad (43)$$

$$\stackrel{(a1)}{=} \frac{\eta_L K}{2} \|\nabla f(x_t)\|^2 + \frac{\eta_L}{2Km^2} \mathbb{E}_t \left\| \sum_{i=1}^m \sum_{k=0}^{K-1} \nabla f_i(x_t^{i,k}) - \nabla f_i(x_t) \right\|^2 - \frac{\eta_L}{2Km^2} \mathbb{E}_t \left\| \sum_{i=1}^m \sum_{k=0}^{K-1} \nabla f_i(x_t^{i,k}) \right\|^2 \quad (44)$$

$$\stackrel{(a2)}{\leq} \frac{\eta_L K}{2} \|\nabla f(x_t)\|^2 + \frac{\eta_L}{2m} \sum_{i=1}^m \sum_{k=0}^{K-1} \mathbb{E}_t \|\nabla f_i(x_t^{i,k}) - \nabla f_i(x_t)\|^2 - \frac{\eta_L}{2Km^2} \sum_{i=1}^m \sum_{k=0}^{K-1} \mathbb{E}_t \|\nabla f_i(x_t^{i,k})\|^2 \quad (45)$$

$$\stackrel{(a3)}{\leq} \frac{\eta_L K}{2} \|\nabla f(x_t)\|^2 + \frac{\eta_L L^2}{2m} \sum_{i=1}^m \sum_{k=0}^{K-1} \mathbb{E}_t \|x_t^{i,k} - x_t\|^2 - \frac{\eta_L}{2m} G^2 \quad (46)$$

$$\stackrel{(a4)}{\leq} \frac{\eta_L K}{2} \|\nabla f(x_t)\|^2 + \frac{5K^2 \eta_L^3 L^2}{2} (\sigma_L^2 + KG^2) \quad (47)$$

where, from Yang et al [2021], (a1) follows from that  $\langle x, y \rangle = \frac{1}{2} [\|x\|^2 + \|y\|^2 - \|x - y\|^2]$  for  $x = \sqrt{\eta_L K} \nabla f(x_t)$  and  $y = -\frac{\sqrt{\eta_L}}{m\sqrt{K}} \sum_{i=1}^m \sum_{k=0}^{K-1} (\nabla f_i(x_t^{i,k}) - \nabla f_i(x_t))$ , (a2) is due to  $\mathbb{E} \|x_1 + x_2 + \dots + x_n\|^2 \leq n\mathbb{E} [\|x_1\|^2 + \|x_2\|^2 + \dots + \|x_n\|^2]$  and  $\mathbb{E} [\|x_1\|^2 + \|x_2\|^2 + \dots + \|x_n\|^2] \leq \mathbb{E} \|x_1 + x_2 + \dots + x_n\|^2$ , (a3) is due to Assumption 3, which is where we start to diverge from Yang et al [2021]. Our result from Lemma 4 by using Assumption 5, combined with removal of the last term, justifies (a4) above, and thus concludes the proof for Lemma 2. The last term of eq(46) could have remained for a tighter final bound in the theorems, but would require to restrict  $K$  such that  $\eta_L K \leq \frac{1}{L}$  which we try to avoid.

$\square$



529 **Lemma 3.** Under Assumptions 1-5 and with full client participation, we claim the following is true:

$$A_2 \leq \frac{\eta_L K^2}{m} [\sigma_L^2 + G^2] \quad (48)$$

530 *Proof.* We start with the following definition of  $\bar{\Delta}_t = \frac{1}{m} \sum_{i=1}^m \Delta_t^i = (-\frac{\eta_L}{m} \sum_{i=1}^m \sum_{k=0}^{K-1} g_i(x_t^{i,k}))$ :

$$\mathbb{E}_t \|\bar{\Delta}_t\|^2 = \mathbb{E}_t \left\| \frac{1}{m} \sum_{i=1}^m \Delta_t^i \right\|^2 \quad (49)$$

$$= \frac{1}{m^2} \mathbb{E}_t \left\| \sum_{i=1}^m \Delta_t^i \right\|^2 = \frac{\eta_L^2}{m^2} \mathbb{E}_t \left\| \sum_{i=1}^m \sum_{k=0}^{K-1} g_i(x_t^{i,k}) \right\|^2 \quad (50)$$

$$= \frac{\eta_L^2}{m^2} \mathbb{E}_t \left\| \sum_{i=1}^m \sum_{k=0}^{K-1} (g_i(x_t^{i,k}) - \nabla f(x_t^{i,k})) \right\|^2 + \frac{\eta_L^2}{m^2} \mathbb{E}_t \left\| \sum_{i=1}^m \sum_{k=0}^{K-1} \nabla f(x_t^{i,k}) \right\|^2 \quad (51)$$

$$\leq \frac{\eta_L K^2}{m} [\sigma_L^2 + G^2] \quad (52)$$

531 which completes the proof of Lemma 3.  $\square$

532 **Lemma 4.** Under Assumptions 3-5 and with full client participation, we claim the following is true:

$$\frac{1}{m} \sum_{i=1}^m \mathbb{E}_t \|x_t^{i,k} - x_t\|^2 \leq 5K [K\eta_L^2 G^2 + \eta_L^2 \sigma_L^2] \quad (53)$$

533 *Proof.* We start by loosely following Lemma 3 from Reddi et al [2020]:

$$\mathbb{E}_t \|x_t^{i,k} - x_t\|^2 = \mathbb{E}_t \|x_t^{i,k-1} - x_t - \eta_L g_i(x_t^{i,k-1})\|^2 \quad (54)$$

$$= \mathbb{E}_t \|x_t^{i,k-1} - x_t - \eta_L (g_i(x_t^{i,k-1}) - \nabla f_i(x_t^{i,k-1}) + \nabla f_i(x_t^{i,k-1}))\|^2 \quad (55)$$

$$\leq (1 + \frac{1}{K-1}) \mathbb{E}_t \|x_t^{i,k-1} - x_t\|^2 + K\eta_L^2 \mathbb{E}_t \|\nabla f_i(x_t^{i,k-1})\|^2 + \eta_L^2 (g_i(x_t^{i,k-1}) - \nabla f_i(x_t^{i,k-1})) \quad (56)$$

$$\leq (1 + \frac{1}{K-1}) \mathbb{E}_t \|x_t^{i,k-1} - x_t\|^2 + K\eta_L^2 G^2 + \eta_L^2 \sigma_L^2 \quad (57)$$

534 The last two inequalities follows Assumption 4 and Assumption 5, which yields a looser bound and  
535 which diverges from Lemma 3 from Reddi et al [2020]. Unrolling the recursion over  $k$  and summing  
536 over clients  $i \in [m]$ :

$$\frac{1}{m} \sum_{i=1}^m \mathbb{E}_t \|x_t^{i,k} - x_t\|^2 \leq \sum_{p=0}^{K-1} (1 + \frac{1}{K-1})^p [K\eta_L^2 G^2 + \eta_L^2 \sigma_L^2] \quad (58)$$

$$\leq K (1 + \frac{1}{K-1})^K [K\eta_L^2 G^2 + \eta_L^2 \sigma_L^2] \quad (59)$$

$$\leq 5K [K\eta_L^2 G^2 + \eta_L^2 \sigma_L^2] \quad (60)$$

537 where  $(1 + \frac{1}{K-1})^K \leq 5$  for  $K > 1$ . This concludes the proof of Lemma 4.  $\square$

## 538 **C Supplementary Materials for Section 5 - Empirical Evaluation and** 539 **Numerical Results**

540 This section summarizes the missing details from Section 5. As mentioned, the datasets, models  
541 and tasks are exactly the same as the "EMNIST CR" task and the "SO NWP" task from Reddi et  
542 al [2020], such that we can use their optimized FedAvg results as baseline. However, Reddi et al  
543 [2020] implement their algorithms on the Tensorflow Federated framework (Ingberman et al. [2019]),  
544 whereas for our work, we build our algorithms on the FedJAX framework (Ro et al. [2021]) which is  
545 under the Apache License.

Table 2: EMNIST character recognition model architecture.

| Layer     | Output Shape | # of Trainable Parameters | Activation | Hyperparameters                   |
|-----------|--------------|---------------------------|------------|-----------------------------------|
| Input     | (28, 28, 1)  | 0                         |            |                                   |
| Conv2d    | (26, 26, 32) | 320                       |            | kernel size = 3; strides = (1, 1) |
| Conv2d    | (24, 24, 64) | 18496                     | ReLU       | kernel size = 3; strides = (1, 1) |
| MaxPool2d | (12, 12, 64) | 0                         |            | pool size = (2, 2)                |
| Dropout   | (12, 12, 64) | 0                         |            | p = 0.25                          |
| Flatten   | 9216         | 0                         |            |                                   |
| Dense     | 128          | 1179776                   |            |                                   |
| Dropout   | 128          | 0                         |            | p = 0.5                           |
| Dense     | 62           | 7998                      | softmax    |                                   |

Table 3: Stack Overflow next word prediction model architecture.

| Layer     | Output Shape | # of Trainable Parameters |
|-----------|--------------|---------------------------|
| Input     | 20           | 0                         |
| Embedding | (20, 96)     | 960384                    |
| LSTM      | (20, 670)    | 2055560                   |
| Dense     | (20, 96)     | 64416                     |
| Dense     | (20, 10004)  | 970388                    |

### 546 C.1 Datasets, Models, and Tasks

547 We train a CNN to do character recognition (EMNIST CR) on the federated EMNIST-62 dataset  
548 (Cohen et al. [2017]). Next, we train a RNN to do next-word-prediction (SO NWP) on the federated  
549 Stack Overflow dataset (Authors [2019]).

550 **Federated EMNIST-62 with CNN** EMNIST consists of images of digits and upper and lower case  
551 English characters, with 62 total classes. The federated version of EMNIST (Caldas et al., 2018)  
552 partitions the digits by their author. The dataset has natural heterogeneity stemming from the writing  
553 style of each person. See Table 4 for more on the statistics of the federated EMNIST-62 dataset.  
554 On our select task of character recognition for this dataset (EMNIST CR), a Convolutional Neural  
555 Network (CNN) is used. The network has two convolutional layers (with  $3 \times 3$  kernels), max pooling,  
556 and dropout, followed by a 128 unit dense layer. A full description of the model is in Table 2.

557 **Federated Stack Overflow with RNN** Stack Overflow is a language modeling dataset consisting of  
558 question and answers from the question and answer site, Stack Overflow. The questions and answers  
559 also have associated metadata, including tags. The dataset contains 342,477 unique users which we  
560 use as clients. See Table 4 for more on the statistics of the federated Stack Overflow dataset. We  
561 perform next-word prediction (Stack Overflow NWP, SO NWP for short) on this dataset. We restrict  
562 the task to the 10,000 most frequently used words, and each client to the first 128 sentences in their  
563 dataset. We also perform padding and truncation to ensure that sentences have 20 words. We then  
564 represent the sentence as a sequence of indices corresponding to the 10,000 frequently used words, as  
565 well as indices representing padding, out-of-vocabulary words, beginning of sentence, and end of  
566 sentence. We perform next-word-prediction on these sequences using a Recurrent Neural Network  
567 (RNN) that embeds each word in a sentence into a learned 96-dimensional space. It then feeds the  
568 embedded words into a single LSTM layer of hidden dimension 670, followed by a densely connected  
569 softmax output layer. A full description of the model is in Table 3. The metric used in the main body  
570 is the top-1 accuracy over the proper 10,000-word vocabulary; that is, it does not include padding,  
571 out-of-vocab, or beginning or end of sentence tokens.

Table 4: Data statistics.

| Dataset       | Train Clients | Train Examples | Test Clients | Test Examples |
|---------------|---------------|----------------|--------------|---------------|
| EMNIST-62     | 3,400         | 671,585        | 3,400        | 77,483        |
| STACKOVERFLOW | 342,477       | 135,818,730    | 204,088      | 16,586,035    |

## C.2 Client Sampling

In all our experiments, we do not include updates from all clients in each communication round. Instead, client sampling is done, where clients are sampled uniformly at random from all training clients, without replacement within a given round, but with replacement across rounds. In our EMNIST CR experiments, 10 out of a total of 3,400 clients are sampled in each communication round, and in our SO NWP experiments, 50 out of a total of 342,477 clients are sampled in each round.

## C.3 Additional Results

Below, we provide additional results from our experiments conducted in Section 5 and whose test accuracy performance results shown in Figure 1. The baseline values were selected for best performance from Reddi et al. [2020].

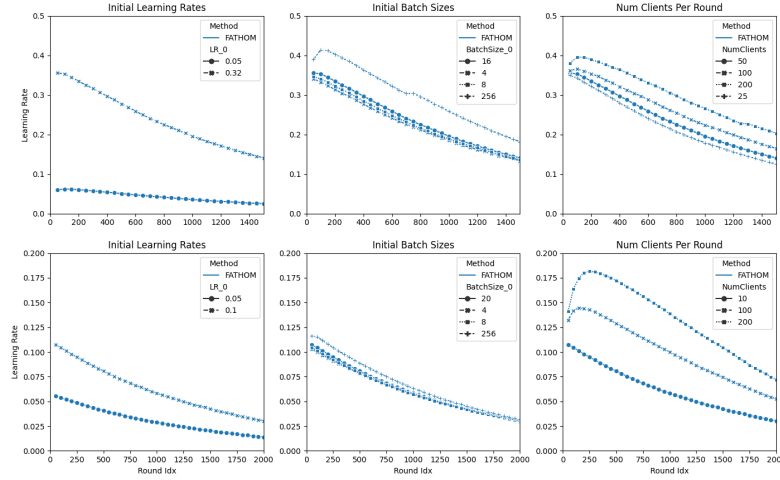

Figure 3: Adaptive client learning rate from the same experiments conducted in Section 5 and in Figure 1. Top row: FSO sims. Bottom row: FEMNIST sims. Baseline values for FEMNIST: LR\_0=0.1, BatchSize\_0=20, NumClients=10. Baseline values for FSO: LR\_0=0.32, BatchSize\_0=16, NumClients=50.

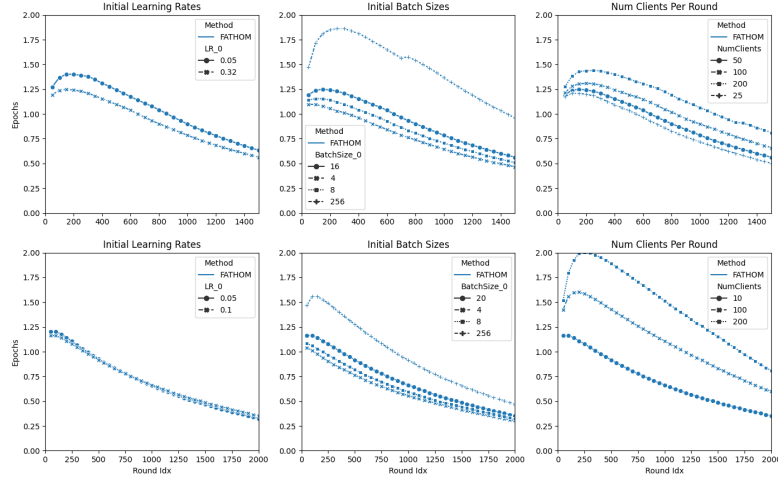

Figure 4: Adaptive number of epochs from the same experiments conducted in Section 5, and in Figures 1 and 3. Top row: FSO sims. Bottom row: FEMNIST sims. Baseline values for FEMNIST: LR\_0=0.1, BatchSize\_0=20, NumClients=10. Baseline values for FSO: LR\_0=0.32, BatchSize\_0=16, NumClients=50.

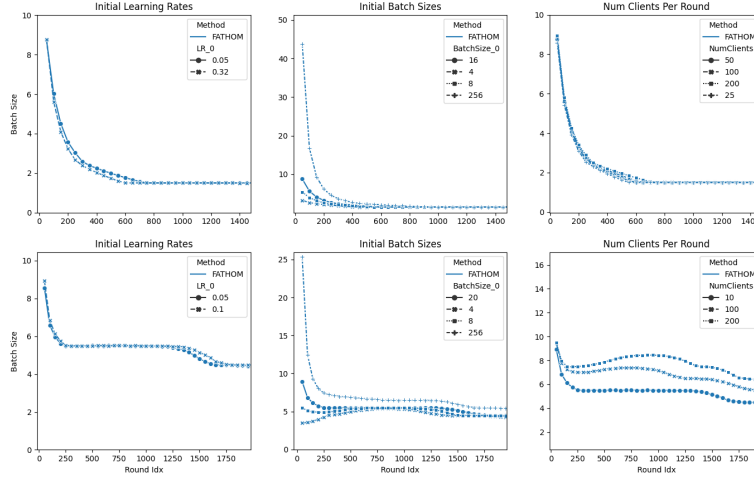

Figure 5: Adaptive batch size from the same experiments conducted in Section 5, and in Figures 1, 3 and 4. Top row: FSO sims. Bottom row: FEMNIST sims. Baseline values for FEMNIST: LR\_0=0.1, BatchSize\_0=20, NumClients=10. Baseline values for FSO: LR\_0=0.32, BatchSize\_0=16, NumClients=50.

## 583 References for the Appendix

- 584 Gregory Cohen, Saeed Afshar, Jonathan Tapson, and Andre Van Schaik. Emnist: Extending mnist to  
585 handwritten letters. In *2017 international joint conference on neural networks (IJCNN)*, pages  
586 2921–2926. IEEE, 2017.
- 587 Sebastian Caldas, Sai Meher Karthik Duddu, Peter Wu, Tian Li, Jakub Konečný, H. Brendan  
588 McMahan, Virginia Smith, and Ameet Talwalkar. Leaf: A benchmark for federated settings, 2018.

589 Alex Ingerman and Krzys Ostrowski. Introducing tensorflow federated, 2019.

590 Sashank Reddi, Zachary Charles, Manzil Zaheer, Zachary Garrett, Keith Rush, Jakub Konečný,  
591 Sanjiv Kumar, and H. Brendan McMahan. Adaptive federated optimization, 2020.

592 Jae Hun Ro, Ananda Theertha Suresh, and Ke Wu. Fedjax: Federated learning simulation with jax.  
593 *arXiv preprint arXiv:2108.02117*, 2021.

594 TensorFlow-Federated-Authors. Tensorflow federated stack overflow dataset, 2019.

595 Jianyu Wang, Zachary Charles, Zheng Xu, Gauri Joshi, H. Brendan McMahan, Blaise Aguera y Arcas,  
596 Maruan Al-Shedivat, Galen Andrew, Salman Avestimehr, Katharine Daly, Deepesh Data, Suhas  
597 Diggavi, Hubert Eichner, Advait Gadhikar, Zachary Garrett, Antonious M. Girgis, Filip Hanzely,  
598 Andrew Hard, Chaoyang He, Samuel Horvath, Zhouyuan Huo, Alex Ingerman, Martin Jaggi, Tara  
599 Javidi, Peter Kairouz, Satyen Kale, Sai Praneeth Karimireddy, Jakub Konecny, Sanmi Koyejo,  
600 Tian Li, Luyang Liu, Mehryar Mohri, Hang Qi, Sashank J. Reddi, Peter Richtarik, Karan Singhal,  
601 Virginia Smith, Mahdi Soltanolkotabi, Weikang Song, Ananda Theertha Suresh, Sebastian U. Stich,  
602 Ameet Talwalkar, Hongyi Wang, Blake Woodworth, Shanshan Wu, Felix X. Yu, Honglin Yuan,  
603 Manzil Zaheer, Mi Zhang, Tong Zhang, Chunxiang Zheng, Chen Zhu, and Wennan Zhu. A field  
604 guide to federated optimization, 2021.

605 Haibo Yang, Minghong Fang, and Jia Liu. Achieving linear speedup with partial worker participation  
606 in non-iid federated learning, 2021.
